# Supplementary material
Source: PubMed Central journal article supplement (PMC7855755)
Supplement: NIHMS1657593-supplement-1.pdf [file NIHMS1657593-supplement-1.pdf]

# Supplemental Figure 1

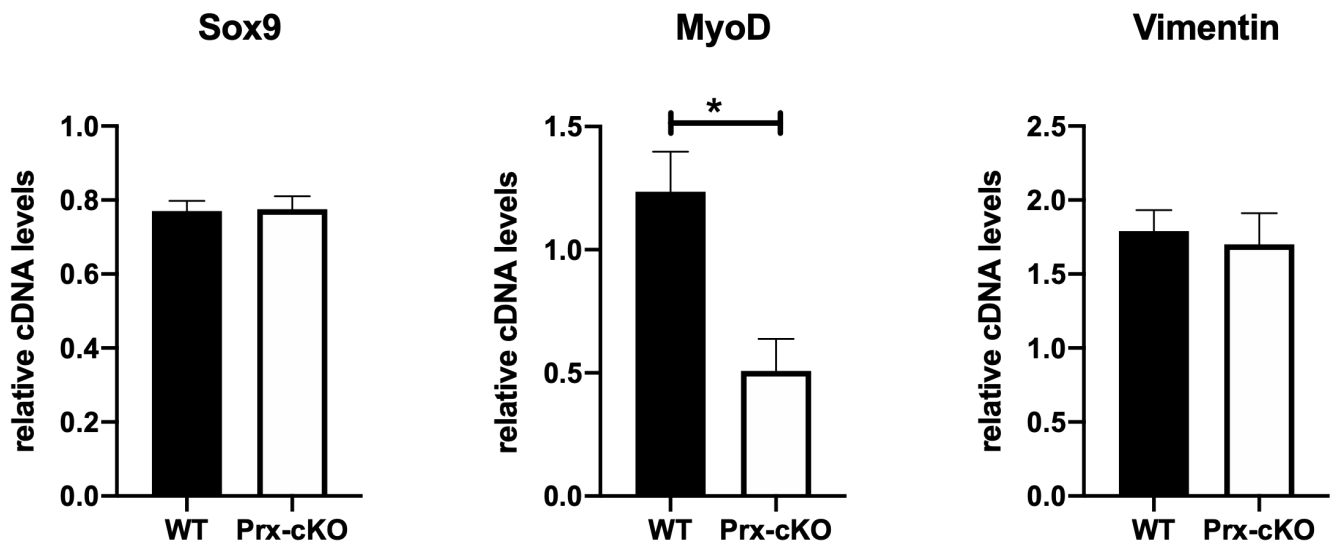

## Supplemental Figure 1:

Bone marrow cells from WT and *Gata4* Prx-cKO mice were cultured in MesenCult media. RNA was collected and qPCR was performed for the indicated genes.

# Supplemental Figure 2

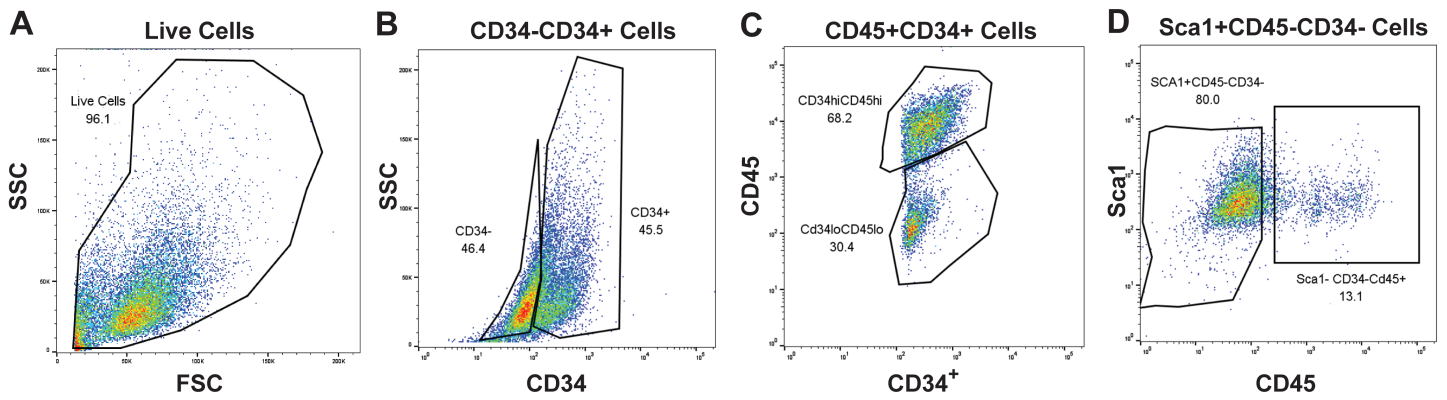

## Supplemental Figure 2:

Flow cytometry scheme for identification of Sca1<sup>+</sup>/CD45<sup>-</sup>/CD34<sup>-</sup>/CD44<sup>-</sup> and Sca1<sup>+</sup>/CD45<sup>-</sup>/CD34<sup>-</sup>/CD44<sup>+</sup> cells.

# Supplemental Figure 3

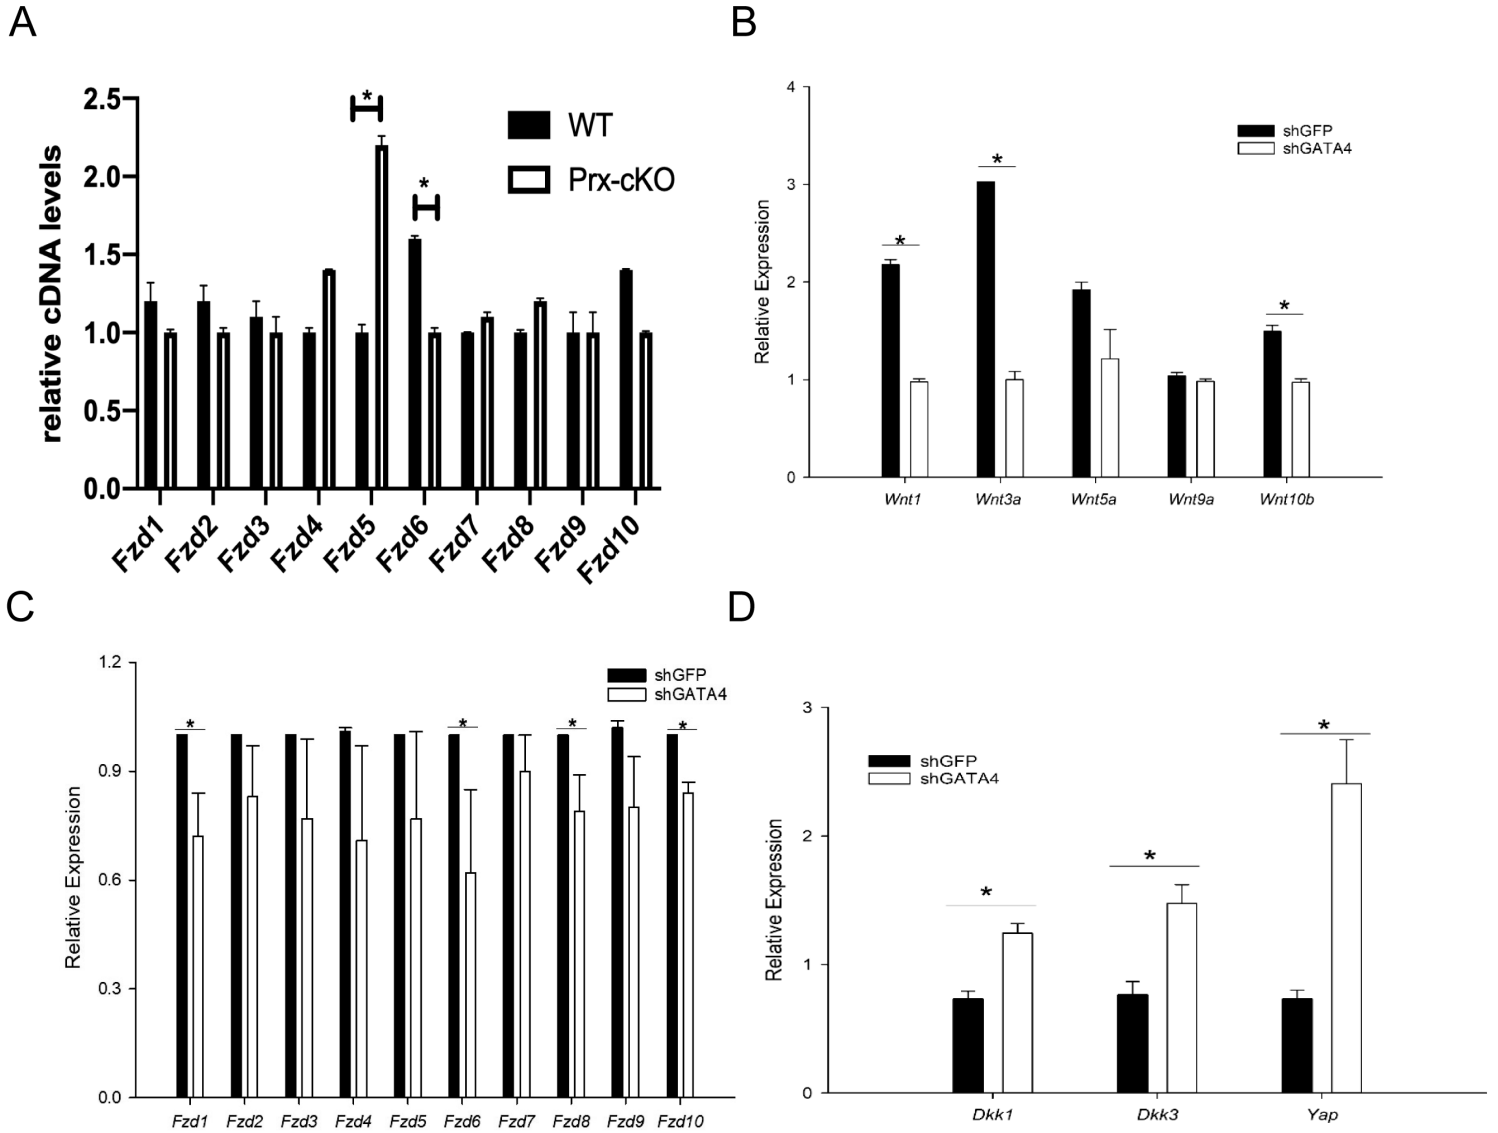

**Supplemental Figure 3:** (A) Bone marrow cells from WT and Gata4 Prx-cKO mice were cultured in MesenCult media. RNA was collected and qPCR was performed to the indicated Fzd genes. (B-D) Calvarial osteoblasts were transduced with lentivirus expressing shC or shGATA4. RNA was collected and qPCR was performed for the indicated genes.

## Supplemental Figure 4

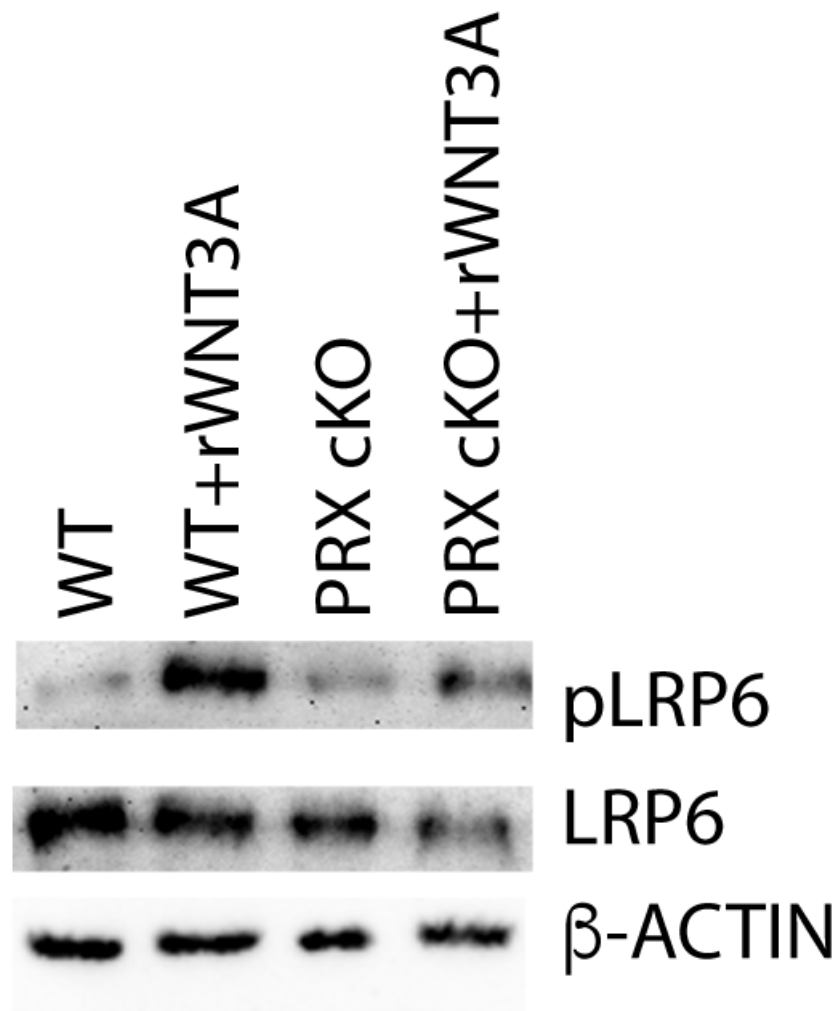

**Supplemental Figure 4:** Bone marrow cells from WT and Gata4 Prx-cKO mice were cultured in MesenCult media. The cells were treated with 40 ng/mL rWNT3A for 30 minutes and then lysed for protein. Immunoblots were performed with antibodies to pLRP6, LRP6 and beta-actin.

## Supplemental table 1

| SEQUENCE | FORWARD PRIMER 5' TO 3'  | REVERSE PRIMER 5' TO 3'    |
|----------|--------------------------|----------------------------|
| B-ACTIN  | AGCCATGTACGTAGCCATCC     | CTCTCAGCTGTGGTGGTGAA       |
| RUNX2    | CACGGTGACTCCCCTTACTT     | ATACGTGTGACCCAGTGCAA       |
| PPARG    | CAAGAATACCAAAGTGCGATCAA  | GAGCTGGGTCTTTTCAGAATAATAAG |
| NESTIN   | GAAGCTGGGACTGAAGCACT     | GGTAGAGGCCCAAGGGAGTA       |
|          |                          |                            |
| WNT1     | ACAGCGTTCATCTTCGCAATCACC | AAATCGATGTTGTCAGTGCAGCCC   |
| WNT2     | CGGGTCCTCCTCCGAAGTAG     | TGGATCACAGGAGCAGGACTTT     |
| WNT2B    | GCCCCAGTGATCTGTGACAA     | CACTCTCGGATCCATTCCCC       |
| WNT3     | CTGGTGGGAAGGACAAGACC     | AATGGGAGTCGACGGACAAG       |
| WNT3A    | CCCTTCCAGTCTGGTGTA       | CTTGAAGAAGGGGTGCAGAG       |
| WNT4     | CCAGGTTGGCCACGCGCTAA     | AGCACGCCACTGCGGATGTC       |
| WNT5A    | TTCTTCTAATGGCTTTGGCCACG  | ACTGGTACTGGCATTCTTGATGC    |
| WNT5B    | TAAGTCGGGGCCGAAACTTCTC   | CCGGGGAGACGCGTTG           |
| WNT6     | GATTTCTTCTCCAGCGAGC      | TGAGAGCTCTACCGCAGTCT       |
| WNT7A    | TCAAGGACAAATACAACGAGGCCG | TGGGTCTCTTTCACAGTAATTGGG   |
| WNT7B    | TGAGGCGGGCAGAAAGG        | CCTGACACACCGTGACACTTACA    |
| WNT8A    | GCCTATCTGACTACACCGC      | AGGACAATTCACCGTTCCC        |
| WNT8B    | TGACCGGTCCAAGGCTTAC      | CAACGGTCCCAAGCAAAGT        |
| WNT9A    | GCAGCAAGTTTGTCAAGGAGTTCC | GCAGGAGCCAGACACACCATG      |
| WNT9B    | CTAGTGGCGCGAGGAGATG      | GCCTGGACAGCTTCAAGTAGG      |
| WNT10A   | TTGACATTCTCCGCTCACC      | TAGTTTTCTTCCCCGGTGCC       |
| WNT10B   | ATGCGGATCCACAACAACAG     | TGACGTTCCATGGCATTG         |
| WNT11    | GCAGTGAACAAGACTTCCA      | GTGGGGCATATGGTCTCACT       |
| WNT16    | AGTAGCGGCACCAAGGAGAC     | GAAACTTTCTGCTGAACCACATGC   |
|          |                          |                            |
| DKK1     | TGTTGTGCAAGACACTTCTGGTCC | TGTGGAGCCTAGAAGAATTGCTGG   |
| DKK2     | CCCCTGGCATTCCCATCTT      | GCCTGCCCCAGGCTTTT          |
| DKK3     | GCTTGCACTCAGCTTTGTT      | CGCAGTTTGTGCTGAGTGTG       |
| YAP      | AGGAGAGACTGCGTTGAAA      | GAGGGATGCTGTAGCTGCTC       |
| LRP5     | AGTGGAGCACGTGATTGAGTTGG  | TTGTCAAGGTCTCTCCACAAGC     |
| LRP6     | TACATGCTTTCAGCCAACAGAGGC | TTGCAAGTCTTCCATTCTCCAGC    |
| FZD6     | CCGAGCAGTTGCCCCAG        | GGGACCTTCCATCTTGCCA        |

## ChiP primers

| SEQUENCE     | FORWARD PRIMER 5' TO 3' | REVERSE PRIMER 5' TO 3' |
|--------------|-------------------------|-------------------------|
| IS7          | CTGAAGCCAAGAGGCAGATT    | CGCACATCCTTTCAGGTGCT    |
| WNT3A ENH    | ACCACTTTAAGTACCGGCGA    | GATATGCTGTTGTTTCGCCTT   |
| WNT10B ENH 1 | GGACAAGCGACAAGGGTCTG    | GGAAAGCACCGATCTGGGTTA   |
| WNT10B PROM  | TCTTGGGGCTTAAACCGTGG    | CACCCGTGAGTTAGGTCGAG    |
| FZD6 ENH     | GCAGCAATAAAGCTTGCAGGA   | TGCTCTGGGTCTTGTAGATG    |
| DKK1 ENH 1   | GTCTGATGATCGGAGGCAGAC   | ACAGGCCTCGAGTAACTGTA    |
| DKK1 PROM 1  | CACAGCACCCCTCTTACCTG    | CGGGAGTTCTCTATGAGGGC    |
| YAP ENH 1    | GTCTTCTCATGACGCTCT      | TTGCTGACCTCATGAACCC     |
| YAP ENH 2    | GGATCAGGATCCACAGCAGG    | GATTCACCTACCTTCCCACC    |
